# Supplementary material for: Could Proprioceptive Stimuli Change Saddle Pressure on Male Cyclists during Different Hand Positions? An Exploratory Study of the Effect of the Equistasi® Device
Source: MDPI journal article supplement (doi:10.3390/sports10060088), 2022-06-02
Supplement: s1 [file s1]

*Article*

# Could Proprioceptive Stimuli Change Saddle Pressure on Male Cyclists during Different Hand Positions? An Exploratory Study of the Effect of the Equistasi® Device

Annamaria Guiotto <sup>1,†</sup>, Fabiola Spolaor <sup>1,†</sup>, Giovanni Albani <sup>2</sup> and Zimi Sawacha <sup>1,3,\*</sup>

<sup>1</sup> Department of Information Engineering, University of Padova, 35131 Padova, Italy; annamaria.guiotto@unipd.it (A.G.); fabiola.spolaor@unipd.it (F.S.)

<sup>2</sup> Istituto Auxologico Italiano, IRCCS, 28921, Verbania, Italy; g.albani@auxologico.it

<sup>3</sup> Department of Medicine, University of Padova, 35128, Padova, Italy

\* Correspondence: zimi.sawacha@unipd.it; Tel. +39-049-8277633

† These authors contributed equally to this work.

## Supplementary material A

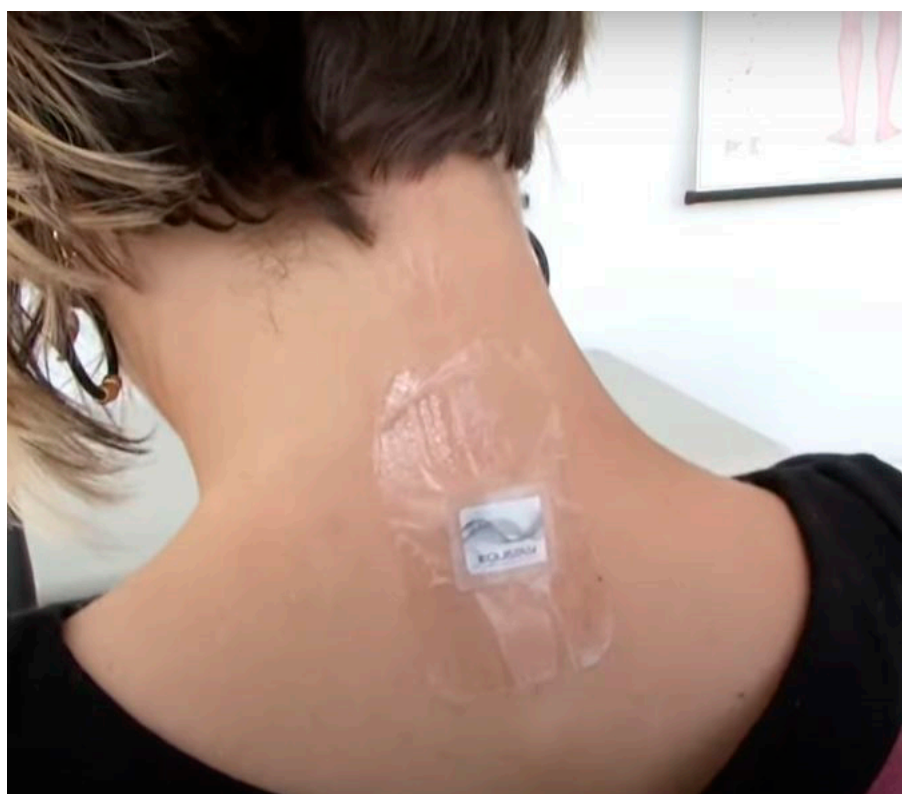

**Figure S1.** Example of band aid attachment for the Equistasi® device.

## Supplementary material B

**Table S1.** Results of the statistical tests (2-way Anova or Friedman where appropriate) on the comparisons among the different hands positions without the Equistasi® device (top handlebar – TH – hands on lever – LH – and drop handlebar – DH) in the whole saddle (WS), anterior saddle (AS) and posterior saddle (PS).

| X2 or F values    | TH vs LH vs DH |        |         |
|-------------------|----------------|--------|---------|
|                   | WS             | AS     | PS      |
| average pressure  | 4.2979         | 1.1295 | 15.9374 |
| peak of pressure  | 6.4834         | 1.6268 | 17.2295 |
| contact surface   | 1.8617         | 2.6913 | 10.0706 |
| average force     | 3.4833         | 3.1219 | 11.8834 |
| pti               | 6.3124         | -      | -       |
| contact surface % | 1.8731         | -      | -       |
| pressure ratio    | 5.8237         | -      | -       |
| peak position     | 7.2952         | -      | -       |
| COP position      | 5.6217         | -      | -       |
| p values          | TH vs LH vs DH |        |         |
|                   | WS             | AS     | PS      |
| average pressure  | 0.1166         | 0.5685 | 0.0003  |
| peak of pressure  | 0.0391         | 0.4433 | 0.0002  |
| contact surface   | 0.3942         | 0.2604 | 0.0065  |
| average force     | 0.1752         | 0.2099 | 0.0026  |
| pti               | 0.0426         | -      | -       |
| contact surface % | 0.3920         | -      | -       |
| pressure ratio    | 0.0033         | -      | -       |
| peak position     | 0.0008         | -      | -       |
| COP position      | 0.0039         | -      | -       |

**Table S2.** Results of the statistical tests (2-way Anova or Friedman where appropriate) on the comparisons among the different conditions with the Equistasi ® device for the hands positions (top handlebar – TH – hands on lever – LH – and drop handlebar – DH) in the whole saddle (WS), anterior saddle (AS) and posterior saddle (PS).

| X2 or F values    | TH vs LH vs DH |        |         |
|-------------------|----------------|--------|---------|
|                   | WS             | AS     | PS      |
| average pressure  | 4.8814         | 2.2480 | 7.2247  |
| peak of pressure  | 6.6186         | 1.6264 | 6.4517  |
| contact surface   | 8.2195         | 0.9434 | 8.9615  |
| average force     | 9.4248         | 1.7312 | 10.6238 |
| pti               | 4.7966         | -      | -       |
| contact surface % | 8.7216         | -      | -       |
| pressure ratio    | 0.2997         | -      | -       |
| peak position     | 0.9932         | -      | -       |
| COP position      | 1.6053         | -      | -       |
| p values          | TH vs LH vs DH |        |         |
|                   | WS             | AS     | PS      |
| average pressure  | 0.0271         | 0.1338 | 0.0072  |
| peak of pressure  | 0.0101         | 0.2022 | 0.0111  |

|                          |        |        |        |
|--------------------------|--------|--------|--------|
| <b>contact surface</b>   | 0.0041 | 0.3314 | 0.0028 |
| <b>average force</b>     | 0.0021 | 0.1883 | 0.0011 |
| <b>pti</b>               | 0.0285 | -      | -      |
| <b>contact surface %</b> | 0.0031 | -      | -      |
| <b>pressure ratio</b>    | 0.5845 | -      | -      |
| <b>peak position</b>     | 0.3196 | -      | -      |
| <b>COP position</b>      | 0.2059 | -      | -      |

**Table S3.** Results of the statistical tests (paired T-test or Wilcoxon signed rank as post-hoc 2-way Anova or Friedman where appropriate) on the comparisons among the different hands positions (top handlebar – TH – hands on lever – LH – and drop handlebar – DH) in the whole saddle (WS), anterior saddle (AS) and posterior saddle (PS) for the conditions without and with the Equistasi® device (noE and E respectively).

| Z or T values            | WS       |          |          |          |          |          |
|--------------------------|----------|----------|----------|----------|----------|----------|
|                          | noE      |          |          | E        |          |          |
|                          | TH vs LH | TH vs DH | LH vs DH | TH vs LH | TH vs DH | LH vs DH |
| <b>average pressure</b>  | 0.0381   | 2.5814   | 3.6113   | 0.2101   | 4.2265   | 4.7414   |
| <b>peak of pressure</b>  | 0.2594   | 2.9847   | 3.3331   | 0.2553   | 3.9680   | 4.7035   |
| <b>contact surface</b>   | -3.1364  | 2.3072   | 4.8953   | -0.9563  | 4.4004   | 5.8114   |
| <b>average force</b>     | -1.8559  | 2.4652   | 3.8619   | -0.6280  | 1.5792   | 5.8115   |
| <b>pti</b>               | 0.0602   | 3.7450   | 4.1998   | 1.5983   | 4.3937   | 1.8216   |
| <b>contact surface %</b> | -3.0609  | 2.4362   | 4.9473   | -1.0932  | 4.5601   | 6.0468   |
| <b>pressure ratio</b>    | -1.1276  | -1.6174  | -0.4749  | -1.3088  | -2.4933  | -1.2764  |
| <b>peak position</b>     | -1.1200  | -2.5577  | -1.5259  | -0.9983  | -2.6453  | -1.7004  |
| <b>COP position</b>      | -1.0533  | -2.2569  | -1.2571  | -0.9149  | -2.3704  | -1.5041  |

| Z or T values           | AS       |          |          |          |          |          |
|-------------------------|----------|----------|----------|----------|----------|----------|
|                         | noE      |          |          | E        |          |          |
|                         | TH vs LH | TH vs DH | LH vs DH | TH vs LH | TH vs DH | LH vs DH |
| <b>average pressure</b> | -3.8646  | -1.4719  | 0.8756   | -2.8049  | -1.2247  | 1.7962   |
| <b>peak of pressure</b> | -3.9128  | -1.6841  | 0.6368   | -3.1160  | -0.8043  | 1.5584   |
| <b>contact surface</b>  | -6.0659  | -5.4266  | -2.3631  | -5.7175  | -4.8832  | -2.2387  |
| <b>average force</b>    | -5.2373  | -4.7996  | -1.4975  | -1.0074  | -3.3449  | -0.3427  |

| Z or T values           | PS       |          |          |          |          |          |
|-------------------------|----------|----------|----------|----------|----------|----------|
|                         | noE      |          |          | E        |          |          |
|                         | TH vs LH | TH vs DH | LH vs DH | TH vs LH | TH vs DH | LH vs DH |
| <b>average pressure</b> | 0.5574   | 4.5863   | 4.9691   | 0.7984   | 3.0840   | 2.3001   |
| <b>peak of pressure</b> | 2.1889   | 2.3325   | 4.8174   | 0.9754   | 3.2496   | 2.3731   |
| <b>contact surface</b>  | 2.9986   | 5.7028   | 5.6480   | 0.6930   | 6.4267   | 6.5939   |
| <b>average force</b>    | 3.1421   | 5.1211   | 5.0149   | 3.1307   | 5.7928   | 6.0271   |

| p values                | WS       |          |          |          |          |          |
|-------------------------|----------|----------|----------|----------|----------|----------|
|                         | noE      |          |          | E        |          |          |
|                         | TH vs LH | TH vs DH | LH vs DH | TH vs LH | TH vs DH | LH vs DH |
| <b>average pressure</b> | 0.9697   | 0.0098   | 0.0003   | 0.8339   | 0.0000   | 0.0000   |
| <b>peak of pressure</b> | 0.7954   | 0.0028   | 0.0009   | 0.7989   | 0.0001   | 0.0000   |
| <b>contact surface</b>  | 0.0017   | 0.0210   | 0.0000   | 0.3389   | 0.0000   | 0.0000   |

|                          |        |        |        |        |        |        |
|--------------------------|--------|--------|--------|--------|--------|--------|
| <b>average force</b>     | 0.0635 | 0.0137 | 0.0001 | 0.5300 | 0.1174 | 0.0000 |
| <b>pti</b>               | 0.9520 | 0.0002 | 0.0000 | 0.1100 | 0.0000 | 0.0709 |
| <b>contact surface %</b> | 0.0022 | 0.0148 | 0.0000 | 0.2743 | 0.0000 | 0.0000 |
| <b>pressure ratio</b>    | 0.2621 | 0.1088 | 0.6359 | 0.1934 | 0.0142 | 0.2046 |
| <b>peak position</b>     | 0.2648 | 0.0117 | 0.1295 | 0.3200 | 0.0092 | 0.0915 |
| <b>COP position</b>      | 0.2941 | 0.0257 | 0.2109 | 0.3619 | 0.0192 | 0.1349 |

  

| p values                |        | AS       |          |          |          |          |
|-------------------------|--------|----------|----------|----------|----------|----------|
|                         |        | noE      |          |          | E        |          |
|                         |        | TH vs LH | TH vs DH | LH vs DH | TH vs LH | TH vs DH |
| <b>average pressure</b> | 0.0001 | 0.1411   | 0.3813   | 0.0050   | 0.2207   | 0.0725   |
| <b>peak of pressure</b> | 0.0001 | 0.0922   | 0.5243   | 0.0018   | 0.4212   | 0.1191   |
| <b>contact surface</b>  | 0.0000 | 0.0000   | 0.0181   | 0.0000   | 0.0000   | 0.0252   |
| <b>average force</b>    | 0.0000 | 0.0000   | 0.1343   | 0.3162   | 0.0008   | 0.7318   |

  

| p values                |        | PS       |          |          |          |          |
|-------------------------|--------|----------|----------|----------|----------|----------|
|                         |        | noE      |          |          | E        |          |
|                         |        | TH vs LH | TH vs DH | LH vs DH | TH vs LH | TH vs DH |
| <b>average pressure</b> | 0.5782 | 0.0000   | 0.0000   | 0.4262   | 0.0025   | 0.0231   |
| <b>peak of pressure</b> | 0.0286 | 0.0215   | 0.0000   | 0.3314   | 0.0015   | 0.0193   |
| <b>contact surface</b>  | 0.0027 | 0.0000   | 0.0000   | 0.4896   | 0.0000   | 0.0000   |
| <b>average force</b>    | 0.0017 | 0.0000   | 0.0000   | 0.0017   | 0.0000   | 0.0000   |

**Table S4.** Results of the statistical tests (paired T-test or Wilcoxon signed rank as post-hoc 2-way Anova or Friedman where appropriate) on the comparisons among the different conditions without and with the Equistasi ® device (noE and E respectively) for the hands positions (top handlebar – TH – hands on lever – LH – and drop handlebar – DH) in the whole saddle (WS), anterior saddle (AS) and posterior saddle (PS).

| Z or T values            |         | WS       |         |    |
|--------------------------|---------|----------|---------|----|
|                          |         | noE vs E |         |    |
|                          |         | TH       | LH      | DH |
| <b>average pressure</b>  | -1.3646 | -1.2311  | -2.3741 |    |
| <b>peak of pressure</b>  | -4.4325 | -1.8835  | -2.6827 |    |
| <b>contact surface</b>   | -5.5974 | -5.7579  | -4.7348 |    |
| <b>average force</b>     | -5.2585 | -5.6335  | -4.1337 |    |
| <b>pti</b>               | -3.8854 | -4.0861  | -2.5212 |    |
| <b>contact surface %</b> | -5.8281 | -5.9905  | -4.9036 |    |
| <b>pressure ratio</b>    | 1.0424  | 0.9390   | 0.1041  |    |
| <b>peak position</b>     | 0.5894  | 0.7314   | 0.4451  |    |
| <b>COP position</b>      | 0.7144  | 0.8959   | 0.6057  |    |

  

| Z or T values           |         | AS       |         |    |
|-------------------------|---------|----------|---------|----|
|                         |         | noE vs E |         |    |
|                         |         | TH       | LH      | DH |
| <b>average pressure</b> | -2.4293 | -2.1512  | -1.5386 |    |
| <b>peak of pressure</b> | -1.9577 | -2.2119  | -0.9635 |    |
| <b>contact surface</b>  | -2.1138 | -2.3236  | -1.7633 |    |
| <b>average force</b>    | -2.0740 | -2.4421  | -1.4175 |    |

| Z or T values    |         | PS       |         |
|------------------|---------|----------|---------|
|                  |         | noE vs E |         |
|                  | TH      | LH       | DH      |
| average pressure | -1.7918 | -1.5772  | -2.5324 |
| peak of pressure | -1.8841 | -4.8108  | -0.8857 |
| contact surface  | -4.8217 | -5.1093  | -3.8596 |
| average force    | -4.5461 | -5.1835  | -3.9640 |

  

| p values          |        | WS       |        |
|-------------------|--------|----------|--------|
|                   |        | noE vs E |        |
|                   | TH     | LH       | DH     |
| average pressure  | 0.1748 | 0.2206   | 0.0176 |
| peak of pressure  | 0.0000 | 0.0622   | 0.0073 |
| contact surface   | 0.0000 | 0.0000   | 0.0000 |
| average force     | 0.0000 | 0.0000   | 0.0000 |
| pti               | 0.0001 | 0.0000   | 0.0117 |
| contact surface % | 0.0000 | 0.0000   | 0.0000 |
| pressure ratio    | 0.2995 | 0.3499   | 0.9173 |
| peak position     | 0.5566 | 0.4658   | 0.6570 |
| COP position      | 0.4763 | 0.3719   | 0.5458 |

  

| p values         |        | AS       |        |
|------------------|--------|----------|--------|
|                  |        | noE vs E |        |
|                  | TH     | LH       | DH     |
| average pressure | 0.0151 | 0.0315   | 0.1239 |
| peak of pressure | 0.0503 | 0.0270   | 0.3353 |
| contact surface  | 0.0345 | 0.0201   | 0.0779 |
| average force    | 0.0381 | 0.0146   | 0.1563 |

  

| p values         |        | PS       |        |
|------------------|--------|----------|--------|
|                  |        | noE vs E |        |
|                  | TH     | LH       | DH     |
| average pressure | 0.0756 | 0.1173   | 0.0113 |
| peak of pressure | 0.0621 | 0.0000   | 0.3777 |
| contact surface  | 0.0000 | 0.0000   | 0.0001 |
| average force    | 0.0000 | 0.0000   | 0.0001 |

## Supplementary material C

### Results concerning the force in peak\_E and the surface in peak\_E

Results concerning the force in peak\_E and the surface in peak\_E were reported in Figures C1 and C2, and following tables. A statistically significant increase in the PS in all the positions can be noticed in both variables for the condition with Equistasi® ( $p < 0.025$ ).

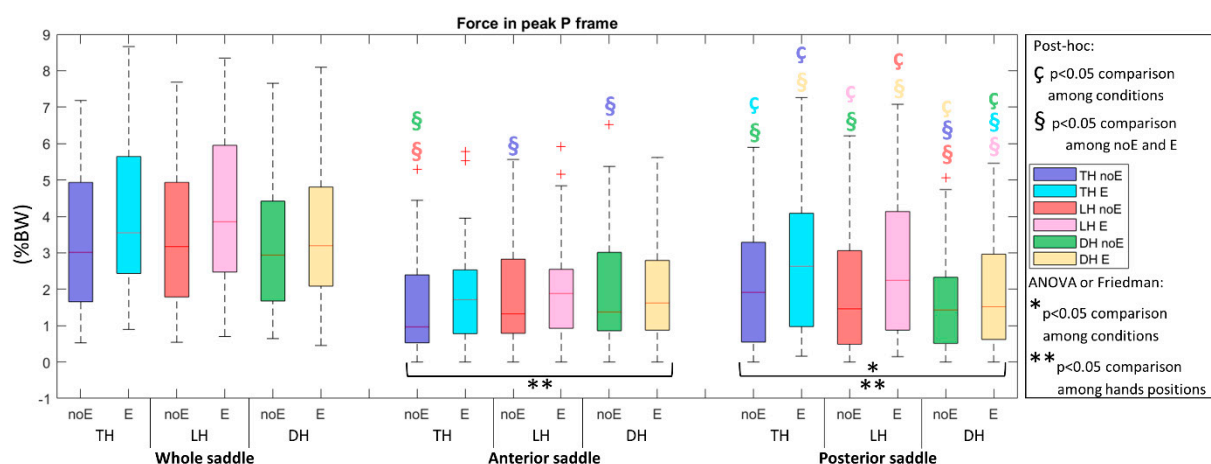

**Figure S2.** Force value in the frame corresponding to the pressure's peak in the Whole saddle, Anterior saddle and Posterior saddle when cycling in top handlebar (TH), hands on lever (LH) and drop handlebar (DH) positions, in the conditions without (noE) and with Equistasi® (E). \* and \*\* means a statistically significant differences ( $p < 0.05$ ) with 2way-Anova or Friedman test in the comparison among conditions (\*) or hands positions (\*\*). § and § means a statistically significant difference ( $p < 0.05$ ) with post-hoc test in the comparison among conditions (§) or hands positions (§): blue with respect to TH noE, light blue with respect to TH E, red with respect to LH noE, pink with respect to LH E, green with respect to DH noE, yellow with respect to DH E.

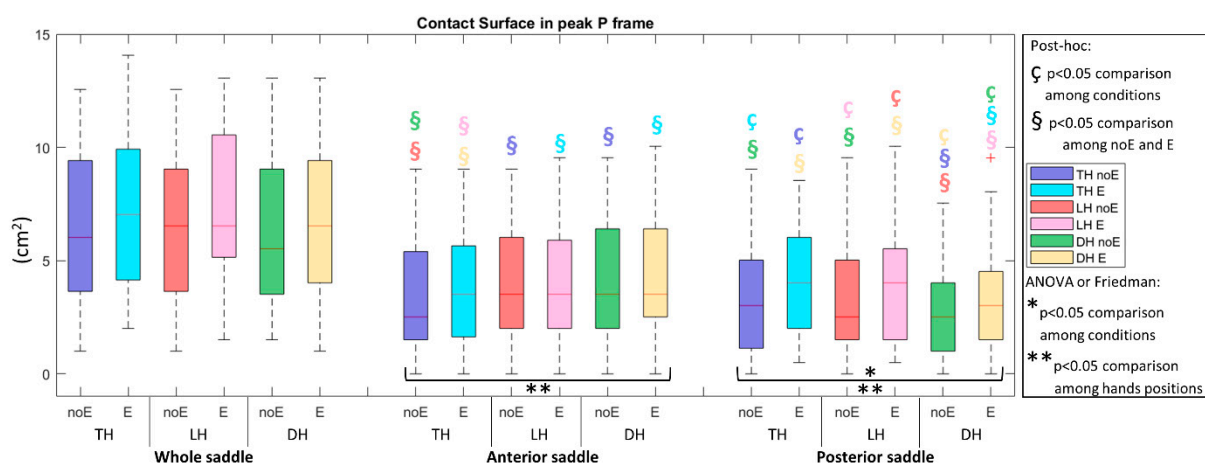

**Figure S3.** Contact surface in the frame corresponding to the peak of pressure in the Whole saddle, Anterior saddle and Posterior saddle when cycling with TH, LH and DH, in the conditions without (noE) and with Equistasi® (E). \* and \*\* means a statistically significant differences ( $p < 0.05$ ) with 2way-Anova or Friedman test in the comparison among conditions (\*) or hands positions (\*\*). § and § means a statistically significant difference ( $p < 0.05$ ) with post-hoc test in the comparison among conditions (§) or hands positions (§): blue with respect to TH noE, light blue with respect to TH E, red with respect to LH noE, pink with respect to LH E, green with respect to DH noE, yellow with respect to DH E.

**Table S5.** Summary of the statistically significant differences on the comparisons among the different hands positions (top handlebar – TH – hands on lever – LH – and drop handlebar – DH) in the

whole saddle (WS), anterior saddle (AS) and posterior saddle (PS) for the conditions without and with the Equistasi® device (noE and E respectively). p values are reported in brackets where significant differences occur (paired T-test or Wilcoxon signed rank as post-hoc 2-way Anova or Friedman where appropriate).

|                              | TH vs LH              |                      | TH vs DH              |                       | LH vs DH             |                      |
|------------------------------|-----------------------|----------------------|-----------------------|-----------------------|----------------------|----------------------|
|                              | noE                   | E                    | noE                   | E                     | noE                  | E                    |
| WS - force in peak           |                       |                      |                       |                       |                      |                      |
| WS - contact surface in peak |                       |                      |                       |                       |                      |                      |
| AS - force in peak           | higher in LH (<0.001) |                      | higher in DH (<0.001) |                       |                      |                      |
| AS - contact surface in peak | higher in LH (<0.001) | higher in LH (0.002) | higher in DH (<0.001) | higher in DH (<0.001) |                      |                      |
| PS - force in peak           |                       |                      | lower in DH (<0.001)  |                       | lower in DH (<0.001) |                      |
| PS - contact surface in peak |                       |                      | lower in DH (0.002)   | lower in DH (0.014)   | lower in DH (<0.001) | lower in DH (<0.001) |

**Table S6.** Results of the statistical tests (2-way Anova or Friedman where appropriate) on the comparisons among the different hands positions without the Equistasi® device (top handlebar – TH – hands on lever – LH – and drop handlebar – DH) in the whole saddle (WS), anterior saddle (AS) and posterior saddle (PS).

| X2 or F values          | TH vs LH vs DH |        |        |
|-------------------------|----------------|--------|--------|
|                         | WS             | AS     | PS     |
| force in peak           | 3.0929         | 3.1579 | 8.8679 |
| contact surface in peak | 1.3153         | 2.6704 | 8.0099 |
| p values                |                |        |        |
|                         | WS             | AS     | PS     |
| force in peak           | 0.2130         | 0.2062 | 0.0119 |
| contact surface in peak | 0.5181         | 0.2631 | 0.0182 |

**Table S7.** Results of the statistical tests (2-way Anova or Friedman where appropriate) on the comparisons among the different conditions with the Equistasi® device for the hands positions (top handlebar – TH – hands on lever – LH – and drop handlebar – DH) in the whole saddle (WS), anterior saddle (AS) and posterior saddle (PS).

| X2 or F values          | TH vs LH vs DH |        |        |
|-------------------------|----------------|--------|--------|
|                         | WS             | AS     | PS     |
| force in peak           | 5.8137         | 2.1338 | 5.8795 |
| contact surface in peak | 3.8603         | 0.2940 | 6.7884 |
| p values                |                |        |        |
|                         | WS             | AS     | PS     |
| force in peak           | 0.0159         | 0.1441 | 0.0153 |
| contact surface in peak | 0.0494         | 0.5877 | 0.0092 |

**Table S8.** Results of the statistical tests (paired T-test or Wilcoxon signed rank as post-hoc 2-way Anova or Friedman where appropriate) on the comparisons among the different hands positions (top handlebar – TH – hands on lever – LH – and drop handlebar – DH) in the whole saddle (WS), anterior saddle (AS) and posterior saddle (PS) for the conditions without and with the Equistasi® device (noE and E respectively).

| Z or T values           |          |          | WS       |          |          |          |
|-------------------------|----------|----------|----------|----------|----------|----------|
|                         |          |          | noE      |          | E        |          |
|                         | TH vs LH | TH vs DH | LH vs DH | TH vs LH | TH vs DH | LH vs DH |
| force in peak           | -0.4275  | 0.3627   | 0.8299   | -0.0085  | 1.6628   | 1.7007   |
| contact surface in peak | -1.8842  | -0.5511  | 1.0753   | -0.0782  | 3.4808   | 3.8681   |
| Z or T values           |          |          | AS       |          |          |          |
|                         |          |          | noE      |          | E        |          |
|                         | TH vs LH | TH vs DH | LH vs DH | TH vs LH | TH vs DH | LH vs DH |
| force in peak           | -4.4308  | -4.9334  | -1.4709  | -0.7401  | -1.9049  | 0.0193   |
| contact surface in peak | -4.1022  | -4.9292  | -1.9257  | -3.0786  | -3.4890  | -1.4383  |
| Z or T values           |          |          | PS       |          |          |          |
|                         |          |          | noE      |          | E        |          |
|                         | TH vs LH | TH vs DH | LH vs DH | TH vs LH | TH vs DH | LH vs DH |
| force in peak           | 0.9750   | 3.6876   | 3.9916   | 1.9169   | 5.4554   | 5.0055   |
| contact surface in peak | 0.1783   | 3.0222   | 3.4968   | 1.9053   | 2.5043   | 3.9826   |
| p values                |          |          | WS       |          |          |          |
|                         |          |          | noE      |          | E        |          |
|                         | TH vs LH | TH vs DH | LH vs DH | TH vs LH | TH vs DH | LH vs DH |
| force in peak           | 0.6700   | 0.7176   | 0.4086   | 0.9932   | 0.0995   | 0.0921   |
| contact surface in peak | 0.0595   | 0.5816   | 0.2822   | 0.9377   | 0.0005   | 0.0001   |
| p values                |          |          | AS       |          |          |          |
|                         |          |          | noE      |          | E        |          |
|                         | TH vs LH | TH vs DH | LH vs DH | TH vs LH | TH vs DH | LH vs DH |
| force in peak           | 0.0000   | 0.0000   | 0.1413   | 0.4610   | 0.0568   | 0.9846   |
| contact surface in peak | 0.0000   | 0.0000   | 0.0541   | 0.0021   | 0.0005   | 0.1504   |
| p values                |          |          | PS       |          |          |          |
|                         |          |          | noE      |          | E        |          |
|                         | TH vs LH | TH vs DH | LH vs DH | TH vs LH | TH vs DH | LH vs DH |
| force in peak           | 0.3296   | 0.0002   | 0.0001   | 0.0553   | 0.0000   | 0.0000   |
| contact surface in peak | 0.8585   | 0.0025   | 0.0005   | 0.0567   | 0.0136   | 0.0001   |

**Table S9.** Results of the statistical tests (paired T-test or Wilcoxon signed rank as post-hoc 2-way Anova or Friedman where appropriate) on the comparisons among the different conditions without and with the Equistasi® device (noE and E respectively) for the hands positions (top handlebar – TH – hands on lever – LH – and drop handlebar – DH) in the whole saddle (WS), anterior saddle (AS) and posterior saddle (PS).

| Z or T values           |  | WS - noE vs E |         |         |
|-------------------------|--|---------------|---------|---------|
|                         |  | TH            | LH      | DH      |
| force in peak           |  | -1.9713       | -1.6418 | -0.7728 |
| contact surface in peak |  | -5.1737       | -3.5456 | -1.1830 |
| pti                     |  | -3.8854       | -4.0861 | -2.5212 |
| contact surface %       |  | -5.8281       | -5.9905 | -4.9036 |
| pressure ratio          |  | 1.0424        | 0.9390  | 0.1041  |
| peak position           |  | 0.5894        | 0.7314  | 0.4451  |
| COP position            |  | 0.7144        | 0.8959  | 0.6057  |
|                         |  | AS - noE vs E |         |         |
|                         |  | TH            | LH      | DH      |



|                                |         |         |         |
|--------------------------------|---------|---------|---------|
| <b>force in peak</b>           | -2.5415 | -1.7128 | -0.9641 |
| <b>contact surface in peak</b> | -1.5412 | -0.9376 | -0.2794 |

| <b>PS - noE vs E</b>           |           |           |           |
|--------------------------------|-----------|-----------|-----------|
|                                | <b>TH</b> | <b>LH</b> | <b>DH</b> |
| <b>force in peak</b>           | -4.2556   | -3.9275   | -2.4371   |
| <b>contact surface in peak</b> | -4.4816   | -3.3586   | -2.2411   |

| <b>p values</b>                | <b>WS - noE vs E</b> |           |           |
|--------------------------------|----------------------|-----------|-----------|
|                                | <b>TH</b>            | <b>LH</b> | <b>DH</b> |
| <b>force in peak</b>           | 0.0515               | 0.1038    | 0.4414    |
| <b>contact surface in peak</b> | 0.0000               | 0.0004    | 0.2368    |

| <b>AS - noE vs E</b>           |           |           |           |
|--------------------------------|-----------|-----------|-----------|
|                                | <b>TH</b> | <b>LH</b> | <b>DH</b> |
| <b>force in peak</b>           | 0.0110    | 0.0867    | 0.3350    |
| <b>contact surface in peak</b> | 0.1233    | 0.3485    | 0.7800    |

| <b>PS - noE vs E</b>           |           |           |           |
|--------------------------------|-----------|-----------|-----------|
|                                | <b>TH</b> | <b>LH</b> | <b>DH</b> |
| <b>force in peak</b>           | 0.0000    | 0.0001    | 0.0148    |
| <b>contact surface in peak</b> | 0.0000    | 0.0008    | 0.0250    |
